# Supplementary material for: Understanding neighborhood income segregation around the clock using mobile phone ambient population data
Source: Springer Nature journal article supplement (doi:10.1057/s41599-024-02833-9), 2024-02-29

**Table A1***Fit Statistics of Group-based Trajectory Analysis*


---

| #Groups                 | 2         | 3         | 4         | 5         | 6         | 7         | 8         |
|-------------------------|-----------|-----------|-----------|-----------|-----------|-----------|-----------|
| <b>Weekday</b>          |           |           |           |           |           |           |           |
| <i>Terms: Linear</i>    |           |           |           |           |           |           |           |
| LogL                    | -97037.85 | -91204.74 | -87997.38 | -85698.89 | -84453.25 | -83569.66 | -82298.36 |
| BIC                     | 194147.9  | 182523.0  | 176139.2  | 171583.5  | 169143.9  | 167407.6  | 164906.3  |
| <i>Terms: Quadratic</i> |           |           |           |           |           |           |           |
| LogL                    | -97001.88 | -91163.12 | -87935.54 | -85654.93 | -84399.35 | -83495.44 | -82229.93 |
| BIC                     | 194096.6  | 182470.7  | 176067.1  | 171547.2  | 169087.6  | 167331.4  | 164862.3  |
| <i>Terms: Cubic</i>     |           |           |           |           |           |           |           |
| LogL                    | -96971.79 | -91130.03 | -87885.83 | -85591.82 | -84333.82 | -83236.10 | -82071.57 |
| BIC                     | 194046.8  | 182425.2  | 175988.4  | 171472.6  | 169028.8  | 166885.0  | 164617.8  |
| <hr/>                   |           |           |           |           |           |           |           |
| <b>Weekend</b>          |           |           |           |           |           |           |           |
| <i>Terms: Linear</i>    |           |           |           |           |           |           |           |
| LogL                    | -96677.87 | -90005.73 | -87099.89 | -84281.89 | -82543.75 | -81430.59 | -80559.46 |
| BIC                     | 193428.0  | 180114.7  | 174344.2  | 168749.5  | 165324.8  | 163139.8  | 161438.8  |
| <i>Terms: Quadratic</i> |           |           |           |           |           |           |           |
| LogL                    | -96654.23 | -89975.35 | -87050.22 | -84222.90 | -82470.56 | -81327.11 | -80453.72 |
| BIC                     | 193401.3  | 180095.2  | 174296.5  | 168683.1  | 165230.1  | 162994.8  | 161309.9  |
| <i>Terms: Cubic</i>     |           |           |           |           |           |           |           |
| LogL                    | -96646.51 | -89965.04 | -87035.30 | -84208.02 | -82450.18 | -81309.74 | -80432.30 |
| BIC                     | 193396.2  | 180095.2  | 174287.3  | 168674.0  | 165251.2  | 163011.6  | 161329.0  |

---

**Table A2***Predicting Daily Standard Deviation of Income Segregation (N=1,193)*

|                                     | Weekday                     | Weekend                     |
|-------------------------------------|-----------------------------|-----------------------------|
| <b>Grid Characteristics</b>         |                             |                             |
| Transportation                      | 0.337* (0.162)              | 0.506*** (0.148)            |
| Education                           |                             |                             |
| Primary/Middle School               | -0.491*** (0.113)           | -0.468*** (0.103)           |
| Post-Secondary Education            | -0.0003 (0.122)             | 0.008 (0.111)               |
| General/Specialty                   | -0.182 (0.126)              | -0.194 <sup>†</sup> (0.115) |
| Community                           | -0.058 (0.128)              | -0.012 (0.116)              |
| Residential                         | -0.566*** (0.133)           | -0.905*** (0.121)           |
| Retail                              |                             |                             |
| Supermarket                         | -0.403*** (0.112)           | -0.325** (0.102)            |
| Wholesale Market                    | -0.238 <sup>†</sup> (0.130) | -0.035 (0.119)              |
| Street Market                       | -0.157 (0.193)              | -0.076 (0.176)              |
| Shopping Center                     | -0.319** (0.115)            | -0.301** (0.105)            |
| Public Facility                     | -0.075 (0.101)              | -0.086 (0.093)              |
| Entertainment                       | -0.122 (0.123)              | -0.108 (0.112)              |
| Accommodation                       | -0.275* (0.125)             | -0.339** (0.114)            |
| Office                              | -0.229 <sup>†</sup> (0.118) | -0.138 (0.107)              |
| <b>Neighborhood Characteristics</b> |                             |                             |
| #Residents (ln)                     | -0.114 (0.084)              | -0.176* (0.078)             |
| Non-local Rate (%)                  | 0.053 (0.264)               | 0.098 (0.244)               |
| Intercept                           | 5.056*** (0.614)            | 5.342*** (0.570)            |
| <hr/>                               |                             |                             |
| Log Likelihood                      | -2,251.238                  | -2,143.073                  |
| Intra-class Correlation (ICC)       | 0.185                       | 0.204                       |

Note:

<sup>†</sup>p<0.1; \* p<0.05; \*\* p<0.01; \*\*\* p<0.001

**Table A3***Predicting Significant Group Membership Shifts between Weekday and Weekend (N=1,193)*

|                                     | Change >=2                 | Change >= 3                 |
|-------------------------------------|----------------------------|-----------------------------|
| <b>Grid Characteristics</b>         |                            |                             |
| Transportation                      | 0.665 <sup>†</sup> (0.354) | 0.237 (0.784)               |
| Education                           |                            |                             |
| Primary/Middle School               | -0.590* (0.269)            | -1.195* (0.536)             |
| Post-Secondary Education            | -0.009 (0.300)             | 0.550 (0.492)               |
| Hospital                            |                            |                             |
| General/Specialty                   | -0.141 (0.353)             | -0.334 (0.784)              |
| Community                           | 0.197 (0.360)              | -0.211 (0.797)              |
| Residential                         | -0.196 (0.253)             | 0.043 (0.399)               |
| Retail                              |                            |                             |
| Supermarket                         | -0.124 (0.285)             | 0.661 (0.467)               |
| Wholesale Market                    | 0.181 (0.336)              | 0.287 (0.670)               |
| Street Market                       | 0.757 (0.484)              | 0.838 (1.119)               |
| Shopping Center                     | -1.034** (0.356)           | -1.477 <sup>†</sup> (0.805) |
| Public Facility                     | -0.095 (0.235)             | 0.085 (0.401)               |
| Entertainment                       | -0.840** (0.311)           | -1.508* (0.699)             |
| Accommodation                       | 0.007 (0.297)              | -0.068 (0.562)              |
| Office                              | 0.038 (0.271)              | -0.770 (0.532)              |
| <b>Neighborhood Characteristics</b> |                            |                             |
| #Residents (ln)                     | 0.101 (0.149)              | 0.008 (0.240)               |
| Non-local Rate (%)                  | 0.522 (0.526)              | 1.782* (0.863)              |
| Intercept                           | -2.483* (1.092)            | -3.486 <sup>†</sup> (1.794) |
| Log Likelihood                      |                            |                             |
|                                     | -334.526                   | -137.852                    |
| Intra-class Correlation (ICC)       |                            |                             |
|                                     | 0.027                      | 0.007                       |

Note:

<sup>†</sup>p<0.1; \* p<0.05; \*\* p<0.01; \*\*\* p<0.001

Figure A1 Spatial Distribution of Income Segregation at Four Selected Hours

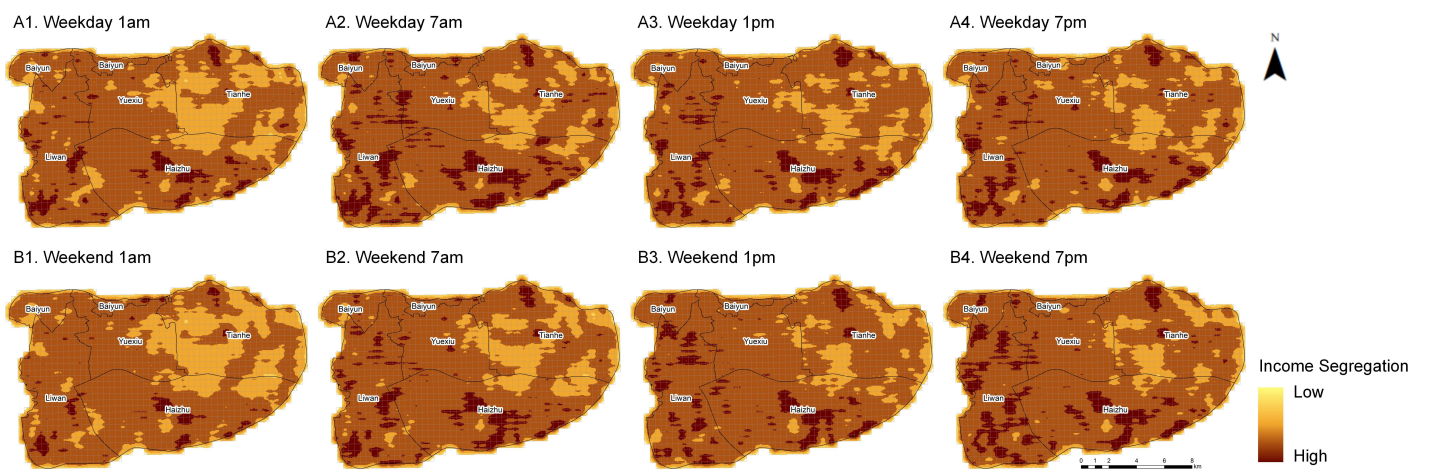



Figure A3 Transition between Segregation Trajectory Groups

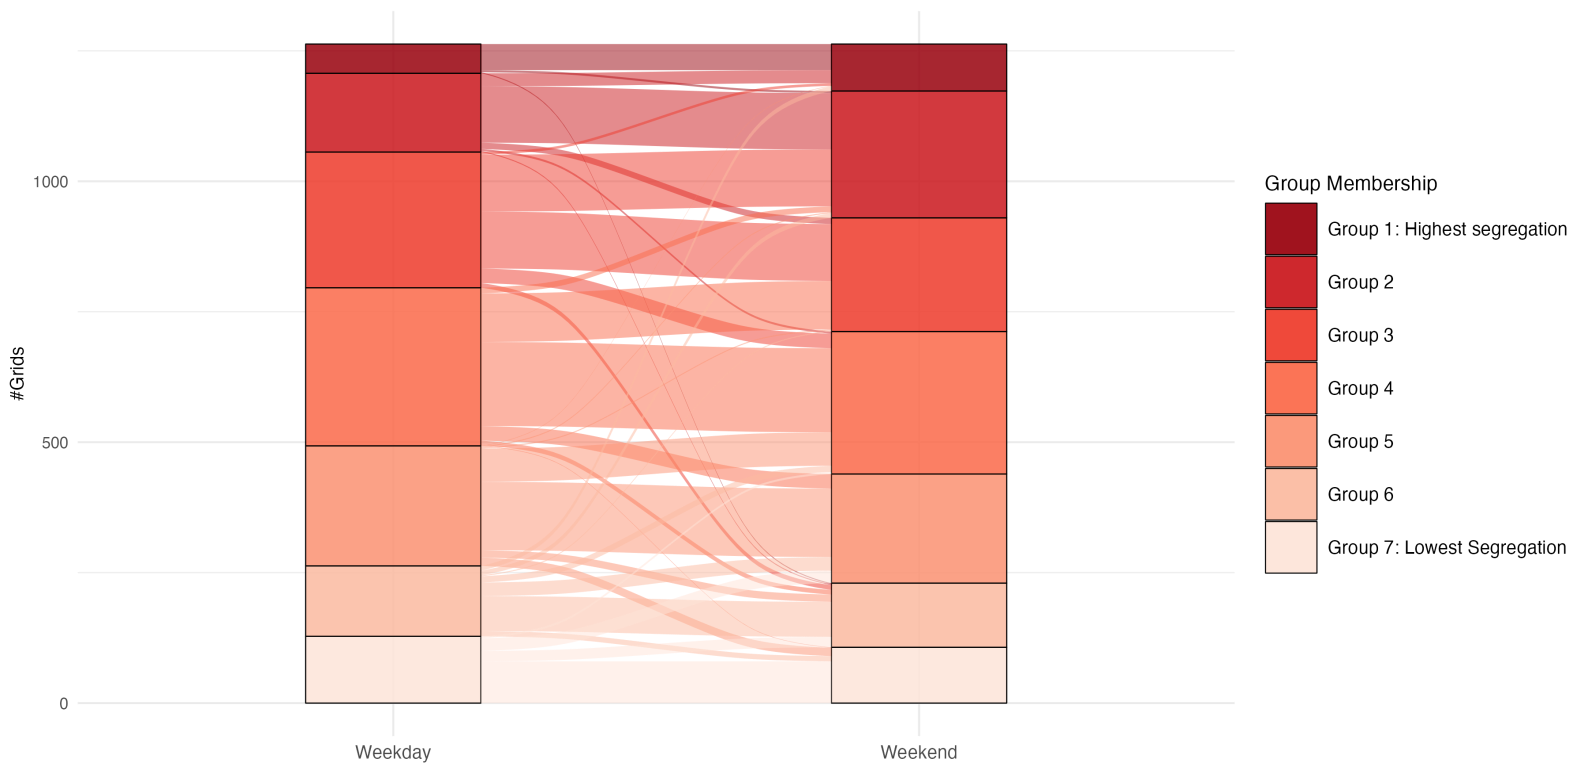

Supplement: MOESM1 [file 41599_2024_2833_MOESM1_ESM.pdf]
